# Supplementary material for: Correlates of HIV Testing Frequency in MSM Based on a Survey from 2011-2018: A Hint for Risk Reduction Strategy
Source: Research Square preprint supplement (doi:10.21203/rs.3.rs-108687/v1), 2020-11-18
Supplement: Supplementary file 1 [file 777bedbbc68d8263a49e53dd.docx]

**Additional files: Questionnaire**

**MSM Health Registration Form**

(Initial HIV testing registration)

**A01Place: Tianjin**

**A02 Sentinel type: MSM
A03GB code of local administrative divisions: 120000**

A04 No. □□□□(0001—9999)
A05 Fill in date □□□□year □□month □□day

Hello, to provide more convenient testing services for MSM population, Tianjin Disease Prevention and Control Center and Tianjin City Dark Blue Working Group has jointly established the Gay Bath Health Service Station. As part of the testing services, this registration form can help us understand your health knowledge and behavior status. In order to provide you with better service, please fill in truthfully. Please be assured that the information is completely confidential and will not be disclosed to unrelated personnel. If you have any questions during the registration process, the staff will be ready to help you.

**Part 1 Demographic information**

B01 Year of birth ______

B02 Marital status with the female:

①Unmarried ②In marriage ③Cohabitation ④Divorced or widowed

B03 Location of household registration:

①of the city ②Other province (Please specify _____) ③Foreigner (Please specify______)

B04 Ethnic group ______

B05 Time live in the city:

①<3Months ②3~6Months ③7~12Months ④1 ~2 years ⑤2Years or more

B06 Education level:

①Illiterate ②Primary school ③Junior high school ④Senior high or secondary school ⑤College and above

B07 In the past six months, how many times have you been to this bathhouse?

①Once a month ②Once a week ③Twice or more a week

B08 What is your most important route to find a male sexual partner?

(1) Bar / Dance hall

(2) Tea house / Club

(3) Bath

(4) Park / Public toilet / Lawn

(5) Internet / Dating software

(6) Other places (please specify: )

**Part 2 HIV Knowledge**

C01 Can you tell a person infected with HIV from the appearance?

①Yes ②No ③I don't know

C02 Can mosquito bites spread HIV?

①Yes ②No ③I don't know

C03 Can someone be infected with HIV by eating together with an HIV-infected person or AIDS patient?

①Yes ②No ③I don't know

C04 Can someone get HIV by transfusion with blood containing HIV?

①Yes ②No ③I don't know

C05 Is it possible to get HIV if share syringes with people living with HIV?

①Yes ②No ③I don't know

C06 Is it possible that a baby born by an HIV-positive women is infected with HIV?

①Yes ②No ③I don't know

C07 Can proper use of condom reduce HIV transmission?

①Yes ②No ③I don't know

C08 Can having sex with only one sexual partner reduce HIV transmission?

①Yes ②No ③I don't know

**Part 3 Sexual behaviors**

D001 The age when you first had sex with a man______

D01 In the past six months, have you ever had sex with a male?

①Yes ②No (Jump toS01)

D011 In the past six months, how many people of the same sex have you had anal sex with? ______

D02 In the past week, how many times have you had anal sex with male? ______

D021 In the past week, how many people of the same sex have you had anal sex with? ______

D03 Did you use condoms the last time you had sex with male?

①Yes ②No

D04 In the past six months, how often do you use condoms when you had anal sex with male?

①Never ②Sometimes ③Every time.

S01 In the past six months, have you had group sex with male (including with three persons)?

①Yes ②No (Jump toE01)

S02 Do you use condoms when you have group sex (including with three persons)?

①Never ②Sometimes ③Every time.

E01 In the past six months, have you ever had commercial sex with male?

①Yes ②No (Jump to F01)

E02 In the past six months, how often do you use condoms in commercial sex?

①Never ②Sometimes ③Every time

E03 Did you use condoms the last time you had commercial sex with male?

①Yes ②No

F01 In the past six months, have you ever had sex with female?

①Yes ②No (Jump to G01)

F02 In the past six months, how often do you use condoms when you had sex with female? ①Never ②Sometimes ③Every time

F03 Did you use condoms the last time you had sex with female?

①Yes ②No

**Part 4 Drug use**

G01 Have you ever used drugs (including meth, ketamine and other new drugs)

①Yes ②No (Jump to H01)

G02 Have you ever injected drugs?

①Yes ②No (Jump to H01)

G03 Have you ever shared needles with others?

①Yes ②No (Jump toH01)

G04 When injecting drugs in the past six months, how often do you share needles with others?
①Never ②Sometimes ③Every time

**Part 5 Sexually transmitted diseases**

H01 In the past year, have you ever been diagnosed with a sexually transmitted disease?

①Yes ②No (Jump to R01)

H02 In the past year, what sexually transmitted disease have you been diagnosed?
①Gonorrhea ②Syphilis ③Chlamydia infection ④*Condyloma acuminatum* ⑤Genital herpes ⑥Other (please specify ) _______

**Part 6 Perception of HIV risk**

R01 How likely do you think you may be infected with HIV currently?

Very high Relatively high Moderate ④ Relatively low ⑤Very low or not

**Part 7 Utilization of services**

In the past 6 months, have you received the following services for HIV prevention?

I01 Condom promotion and distribution

①Yes ②No

I02 Community medication maintenance treatment/cleaning needle supply or exchange

①Yes ②No

J01 In the past year, have you had HIV test?

①Yes ②No (end of survey)
J02 Do you know the test results yourself?

①Yes ②No

J03 When was your last test? (If you have never done it before, leave it blank, end)

Year _______

Month _______

J04 What was the result of your last test?

①negative ②positive ③I don't know

Registration is over, thank you!
-------------------------------------------------------------------------------------------------------------------

The following are filled out by the staff:

M01 Is the bathhouse patron an MSW？

Yes No

HIV screening test results:

T01 Whether blood was collected in this investigation.

Yes No

T02a Whether it has been tested positive for HIV in the past?

Yes No(jump to T03)

T02b When is the earliest confirmation test positive?

Year _______

Month _______

T03 HIV oral rapid test:

Reactive Non-reactive

T04 HIV blood rapid test:

Reactive Non-reactive

T03 HIV antibody test results:

T03a What is the first ELTSA screening result?

①Positive ②Negative (jump to T04)

T03b What is the second ELISA reexamination result?

①Positive ②Negative

T03c What is the confirmatory test result?

①Positive ②Negative ③Suspicious ④Not detected

T04 Syphilis test results:

T04a What is the ELTSA result?

①Positive ②Negative (skip to T05)

T04b What is the RPR/TRUST test result?

①Positive ②Negative

T05 HCV test results:

T05a What is the first ELISA screening result?

①Positive ②Negative (end)

T05b What is the second ELISA reexamination result?

①Positive ②Negative

HIV Confirmatory test results:

T05 Have the patron received HIV confirmatory test？

Yes No

T06 HIV Confirmatory test results?

Positive Negative
